# Supplementary material
Source: Elsevier journal article supplement (https://www.sciencedirect.com/science/article/pii/S1578219020300159)

## ***Material suplementario***

### ***S1 A. Materiales y métodos***

#### ***A1. Desarrollo del cuestionario Delphi***

El estudio se llevó a cabo mediante la técnica Delphi modificada por las recomendaciones de la RAND/UCLA. Un total de 17 dermatólogos expertos en el tratamiento de la psoriasis, entre los que estaban incluidos los 5 coordinadores regionales, fueron invitados a participar en el estudio. Los expertos, procedentes de diferentes regiones de España, asistieron a una mesa redonda, moderada por el coordinador nacional, donde se presentaron y se debatieron, junto con la evidencia disponible de los ensayos clínicos, diferentes casos de práctica clínica habitual en los escenarios propuestos, donde se había utilizado apremilast. En general, y para enfatizar el foco clínico del estudio, los escenarios se plantearon en forma de casos problemáticos. Este debate, junto con la revisión previa de la literatura, fue la base para elaborar el cuestionario final, que contenía 48 preguntas con un total de 143 ítems a evaluar. Todas las preguntas, en forma de aseveraciones, se diseñaron para ser respondidas en una escala Likert de 9 niveles, en base al acuerdo o desacuerdo con su contenido, donde 1 significaba totalmente en desacuerdo y 9 totalmente de acuerdo. El cuestionario definitivo se envió al panel de expertos en formato electrónico. Tras analizar los resultados de la primera ronda de votación, los participantes votaron de nuevo en un cuestionario de segunda ronda, donde únicamente se incluían los ítems donde no se alcanzó consenso en la primera ronda. Las preguntas incluidas en la segunda ronda podían ser votadas utilizando el mismo criterio anterior o teniendo en cuenta las votaciones de los otros participantes en la primera ronda. Para ello, en el cuestionario de segunda ronda se incluyó la mediana de las puntuaciones de todos los expertos a cada pregunta.

#### ***A2. Análisis de los resultados del cuestionario***

Siguiendo la metodología Rand/UCLA, el nivel de *Adecuación* de cada ítem se clasificó en función de la mediana y de la dispersión de las puntuaciones:

- a. Apropiado: si la mediana del panel estaba comprendida entre 7 y 9, sin desacuerdo.*

- b. *Incierto: si la mediana del panel estaba comprendida entre 4 y 6 o cualquier mediana con desacuerdo.*
- c. *Inapropiado: si la mediana del panel estaba comprendida entre 1 y 3, sin desacuerdo.*

Asimismo, siguiendo las definiciones del BIOMED *Concerted Action on Appropriateness* para diferentes tamaños de panel, el nivel de *Acuerdo* para cada ítem se clasificó en:

- a. *Acuerdo: cuando el número de puntuaciones fuera de la región de 3 puntos que contenía la mediana (1-3; 4-6; 7-9) era  $\leq 4$ .*
- b. *Neutral: cuando no existió ni acuerdo ni desacuerdo.*
- c. *Desacuerdo: cuando el número de puntuaciones en cada extremo (1-3 y 7-9) era  $\geq 5$ .*

Además, se calculó la media de la desviación absoluta desde la mediana (MAD-M), propuesta por la Unidad de Investigación en Servicios de Salud del Instituto de Salud Carlos III:

$$MAD - M = \frac{\sum |d - med|}{n}$$

En la Figura S1 se muestra un esquema resumen de los criterios de evaluación descritos.

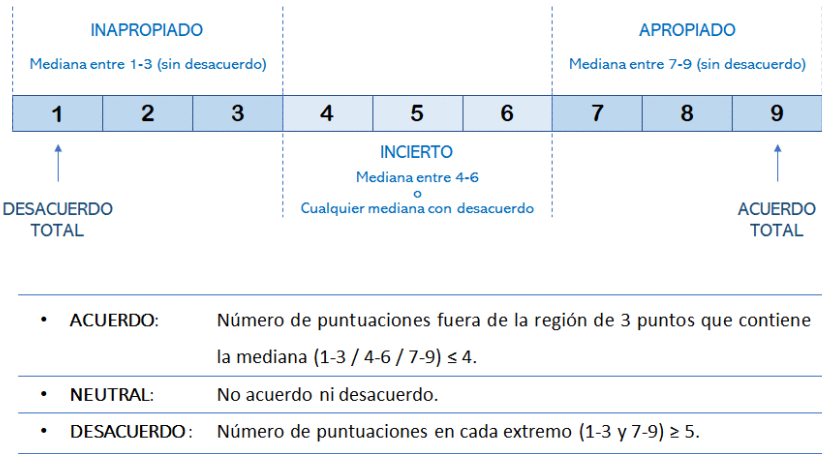

Supplement: mmc2 [file S1578219020300159:mmc2.pdf]
